# Supplementary material
Source: PubMed Central journal article supplement (PMC9704756)
Supplement: NIHMS1507650-supplement-1.pdf [file NIHMS1507650-supplement-1.pdf]

**Supplemental Table 1. Baseline characteristics of REGARDS participants free of cardiovascular disease**

**according to race and sex**

| Characteristics             | Men                |                    | Women              |                    |
|-----------------------------|--------------------|--------------------|--------------------|--------------------|
|                             | Black<br>(n=3,329) | White<br>(n=5,926) | Black<br>(n=6,087) | White<br>(n=7,165) |
| Age (years)±SD              | 64±9               | 65±9               | 63±9               | 64±9               |
| Education <high school n(%) | 561 (17)           | 330 (6)            | 1095 (18)          | 441 (6)            |
| Income <\$35,000            | 1,437 (43)         | 1,459 (25)         | 3,346 (55)         | 2,639 (37)         |
| Region                      |                    |                    |                    |                    |
| Belt n(%)                   | 1,120 (34)         | 2,045 (35)         | 2,058 (34)         | 2,573 (36)         |
| Buckle n(%)                 | 536 (16)           | 1,171 (20)         | 1,178 (19)         | 1,845 (26)         |
| Non-Belt n(%)               | 1,673 (50)         | 2,710 (46)         | 2,851 (47)         | 2,747 (38)         |
| Insurance Status            |                    |                    |                    |                    |
| Yes                         | 2,986 (90)         | 5,663 (96)         | 5,412 (89)         | 6,782 (95)         |

|                                  |            |            |            |            |
|----------------------------------|------------|------------|------------|------------|
| No                               | 338 (10)   | 257 (4)    | 668 (11)   | 379 (5)    |
| BMI kg/m <sup>2</sup> ±SD        | 29±6       | 28±5       | 32±7       | 28±6       |
| Systolic blood pressure ±SD mmHg | 132±17     | 127±15     | 129±17     | 123±16     |
| <b>Behavioral Factors</b>        |            |            |            |            |
| Current smoking n(%)             | 630 (19)   | 668 (11)   | 923 (15)   | 885 (12)   |
| Never exercises n(%)             | 893 (27)   | 1,384 (24) | 2,403 (40) | 2,539 (36) |
| <b>Alcohol Use n(%)</b>          |            |            |            |            |
| Current                          | 1,745 (52) | 3,889 (66) | 2,380 (39) | 4,070 (57) |
| Never                            | 657 (20)   | 1,079 (18) | 2,630 (43) | 2,418 (34) |
| Past                             | 927 (28)   | 958 (16)   | 1,077 (18) | 677 (9)    |
| Elevated Depressive Symptoms     | 295 (9)    | 284 (5)    | 870 (14)   | 783 (11)   |
| Elevated Stress                  | 854 (26)   | 1,087 (18) | 2,202 (36) | 2,085 (29) |
| <b>Comorbidities</b>             |            |            |            |            |
| Diabetes n(%)                    | 879 (27)   | 781 (14)   | 1,563 (27) | 747 (11)   |
| Atrial fibrillation n(%)         | 145 (5)    | 312 (5)    | 362 (6)    | 445 (6)    |

|                                             |              |              |              |              |
|---------------------------------------------|--------------|--------------|--------------|--------------|
| Left ventricular hypertrophy n(%)           | 414 (13)     | 350 (6)      | 837 (14)     | 368 (5)      |
| <b>ECG Variables</b>                        |              |              |              |              |
| Heart rate $\pm$ SD, bpm                    | 67 $\pm$ 12  | 64 $\pm$ 11  | 69 $\pm$ 11  | 67 $\pm$ 11  |
| QRS interval $\pm$ SD, ms                   | 87 $\pm$ 14  | 91 $\pm$ 15  | 85 $\pm$ 12  | 86 $\pm$ 12  |
| Corrected QT interval $\pm$ SD, ms          | 400 $\pm$ 23 | 402 $\pm$ 22 | 408 $\pm$ 22 | 410 $\pm$ 21 |
| <b>Laboratory Parameters</b>                |              |              |              |              |
| <b>Estimated Glomerular filtration rate</b> |              |              |              |              |
| $\geq$ 90 n(%)                              | 1,659 (52)   | 2,424 (42)   | 3,340 (58)   | 3,166 (46)   |
| 60-89 n(%)                                  | 1,251 (39)   | 2,933 (51)   | 1,832 (32)   | 3,158 (46)   |
| 45-59 n(%)                                  | 170 (5)      | 313 (5)      | 349 (6)      | 427 (6)      |
| <45 n(%)                                    | 109 (3)      | 108 (2)      | 211 (4)      | 162 (2)      |
| <b>Albumin to Creatinine Ratio</b>          |              |              |              |              |
| <15 n(%)                                    | 2,271 (71)   | 4,632 (81)   | 4,230 (74)   | 5,452 (80)   |
| 15-30 n(%)                                  | 332 (10)     | 511 (9)      | 619 (11)     | 782 (11)     |
| >30 n(%)                                    | 579 (18)     | 607 (11)     | 891 (16)     | 607 (9)      |

|                                  |              |              |              |              |
|----------------------------------|--------------|--------------|--------------|--------------|
| Total cholesterol mg/dL $\pm$ SD | 188 $\pm$ 39 | 188 $\pm$ 36 | 199 $\pm$ 40 | 203 $\pm$ 38 |
| HDL mg/dL $\pm$ SD               | 49 $\pm$ 15  | 45 $\pm$ 13  | 57 $\pm$ 16  | 58 $\pm$ 16  |
| Medications                      |              |              |              |              |
| Statins n(%)                     | 782 (24)     | 1,622 (28)   | 1,468 (24)   | 1,703 (24)   |
| Antihypertensives n(%)           | 1,972 (59)   | 2,587 (44)   | 4,040 (67)   | 3,269 (46)   |

|                                  |              |              |              |              |
|----------------------------------|--------------|--------------|--------------|--------------|
| Total cholesterol mg/dL $\pm$ SD | 188 $\pm$ 39 | 188 $\pm$ 36 | 199 $\pm$ 40 | 203 $\pm$ 38 |
| HDL mg/dL $\pm$ SD               | 49 $\pm$ 15  | 45 $\pm$ 13  | 57 $\pm$ 16  | 58 $\pm$ 16  |
| Medications                      |              |              |              |              |
| Statins n(%)                     | 782 (24)     | 1,622 (28)   | 1,468 (24)   | 1,703 (24)   |
| Antihypertensives n(%)           | 1,972 (59)   | 2,587 (44)   | 4,040 (67)   | 3,269 (46)   |
